# Supplementary material for: Bioengineering of one dimensional hierarchical Cu7S4 hollow nanotubes for non-enzymatic glucose sensing applications
Source: Royal Society of Chemistry journal article supplement (doi:10.1039/d4ra05199h), 2024-01-01
Supplement: d4ra05199h1.pdf [file d4ra05199h1.pdf]

### Supplementary data

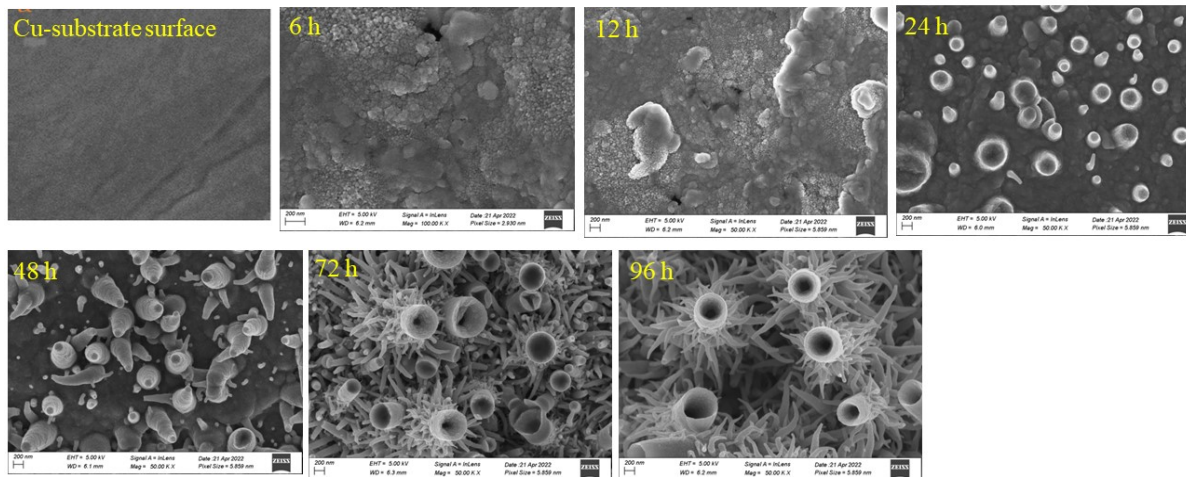

Fig. S1: SEM images of  $\text{Cu}_7\text{S}_4$  on Cu-substrate exposed to volatile organosulfur compounds of *Allium Sativum* at different reaction intervals (from 6-96h)

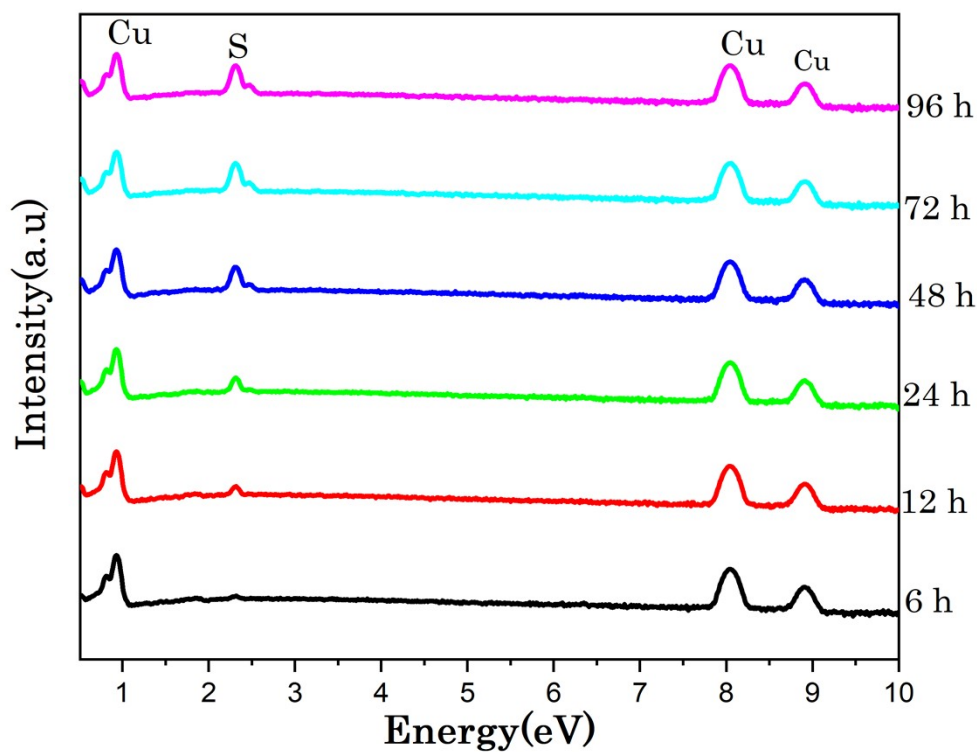

Fig. S2: EDS spectra of  $\text{Cu}_7\text{S}_4$  on Cu-substrate exposed to volatile organosulfur compounds of *Allium Sativum* at different reaction intervals (from 6-96h).
